# Supplementary material for: Chitosan decorated Fe3O4nanoparticles as a magnetic catalyst in the synthesis of phenytoin derivatives
Source: Royal Society of Chemistry journal article supplement (doi:10.1039/c4ra06618a), 2014-10-06

### Spectral data:

<sup>1</sup>H NMR of 5,5-diphenylhydantoin: (3a)

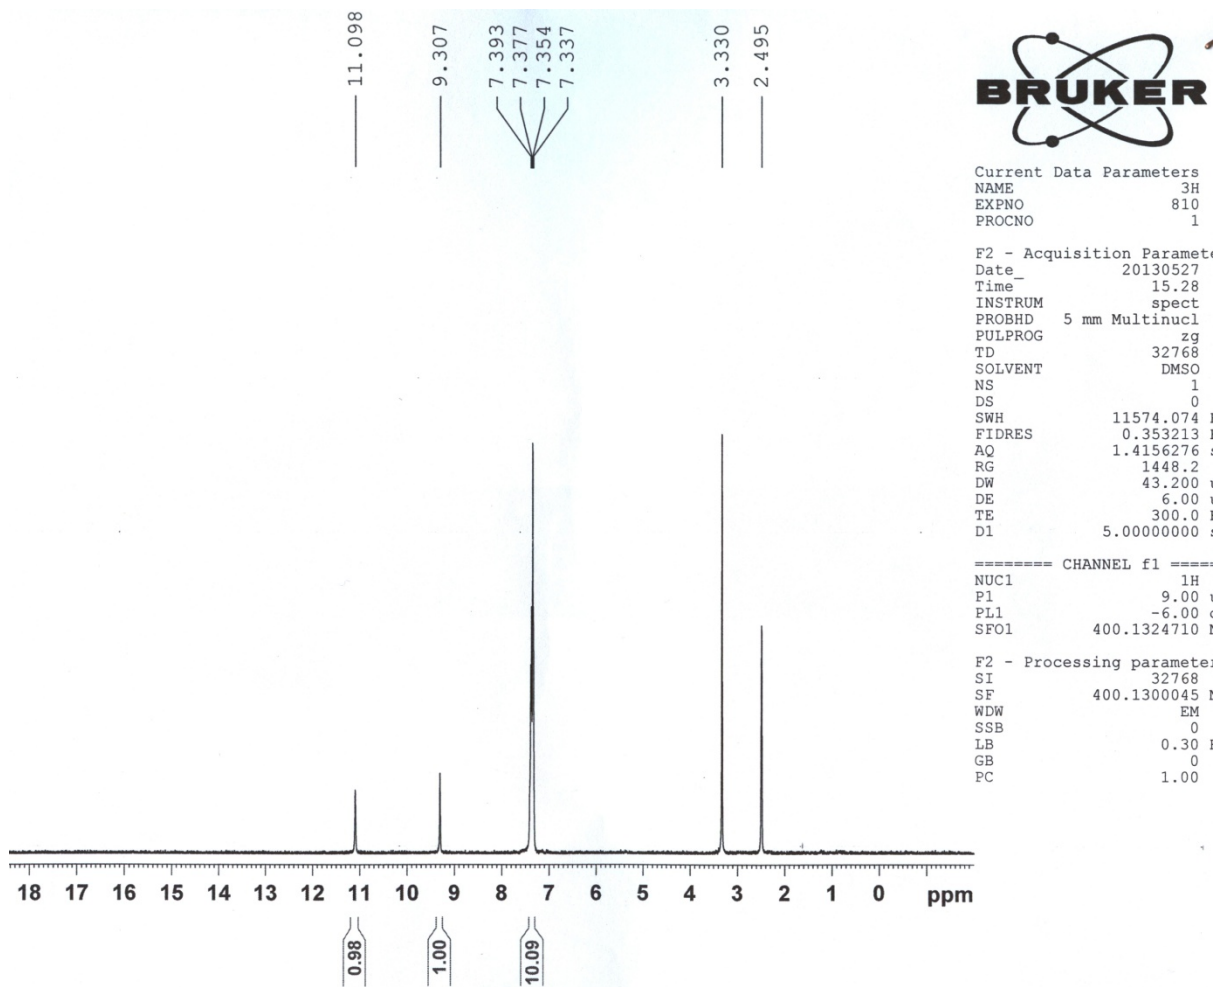

FT-IR of 5,5-diphenylhydantoin: (3a)

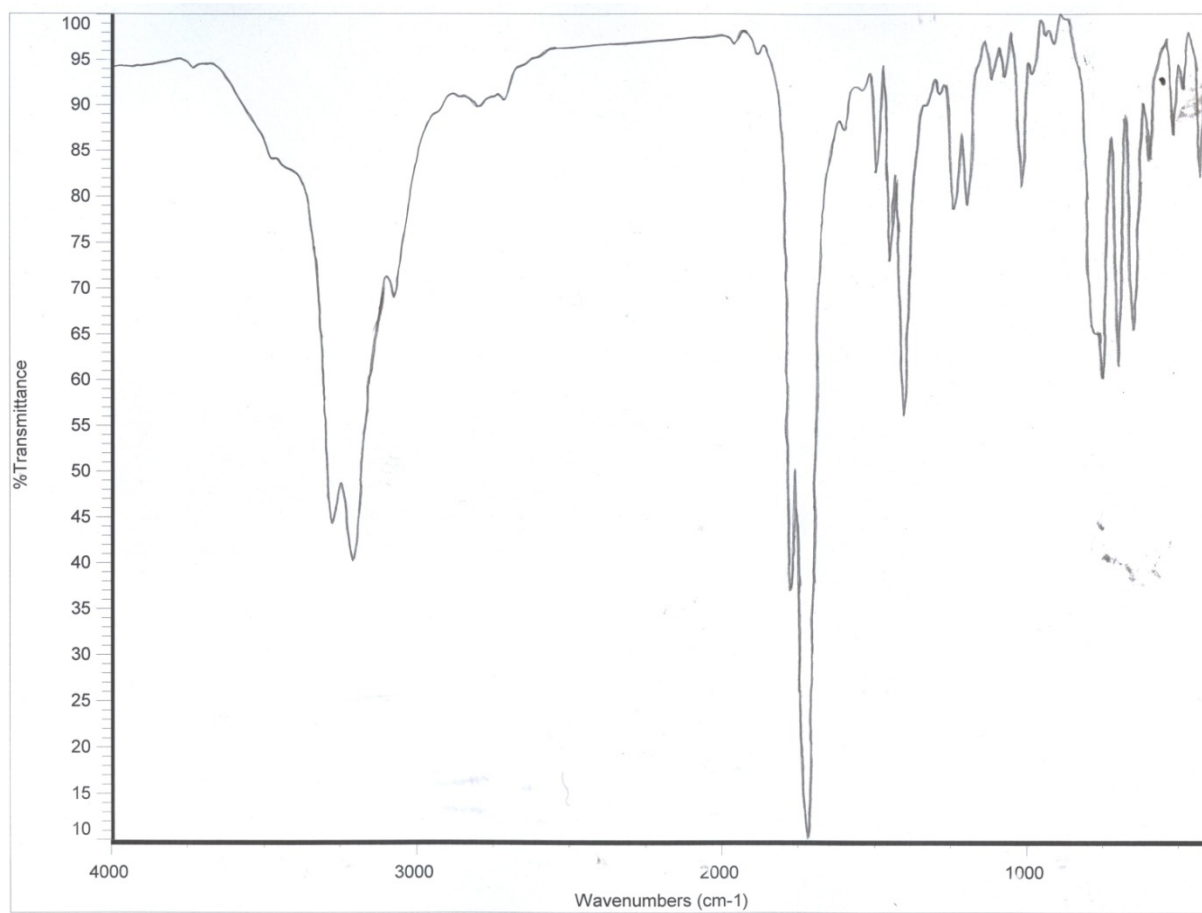

<sup>1</sup>H NMR of 3-methyl-5,5-diphenylhydantoin: (3c)

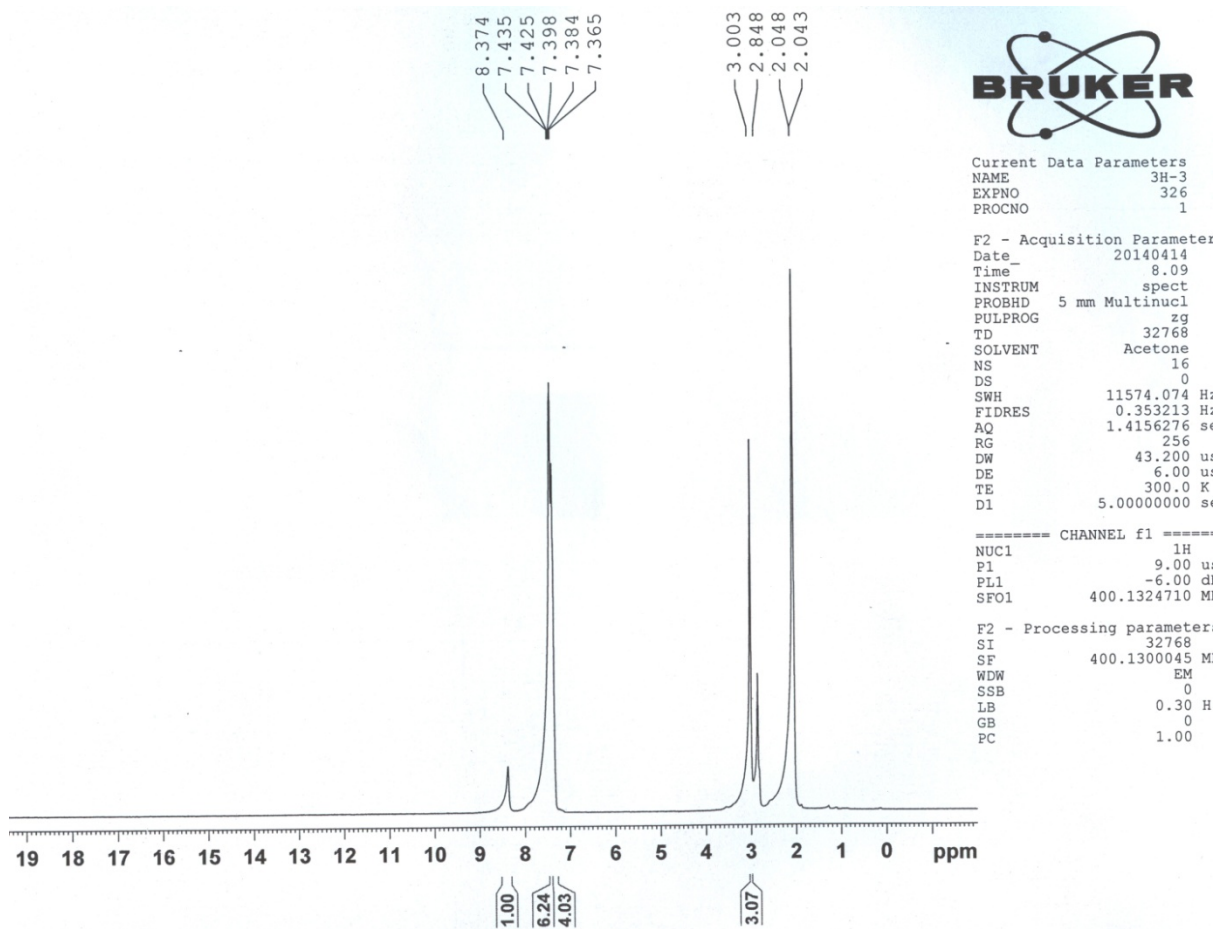

FT-IR of 3-methyl-5,5-diphenylhydantoin: (3c)

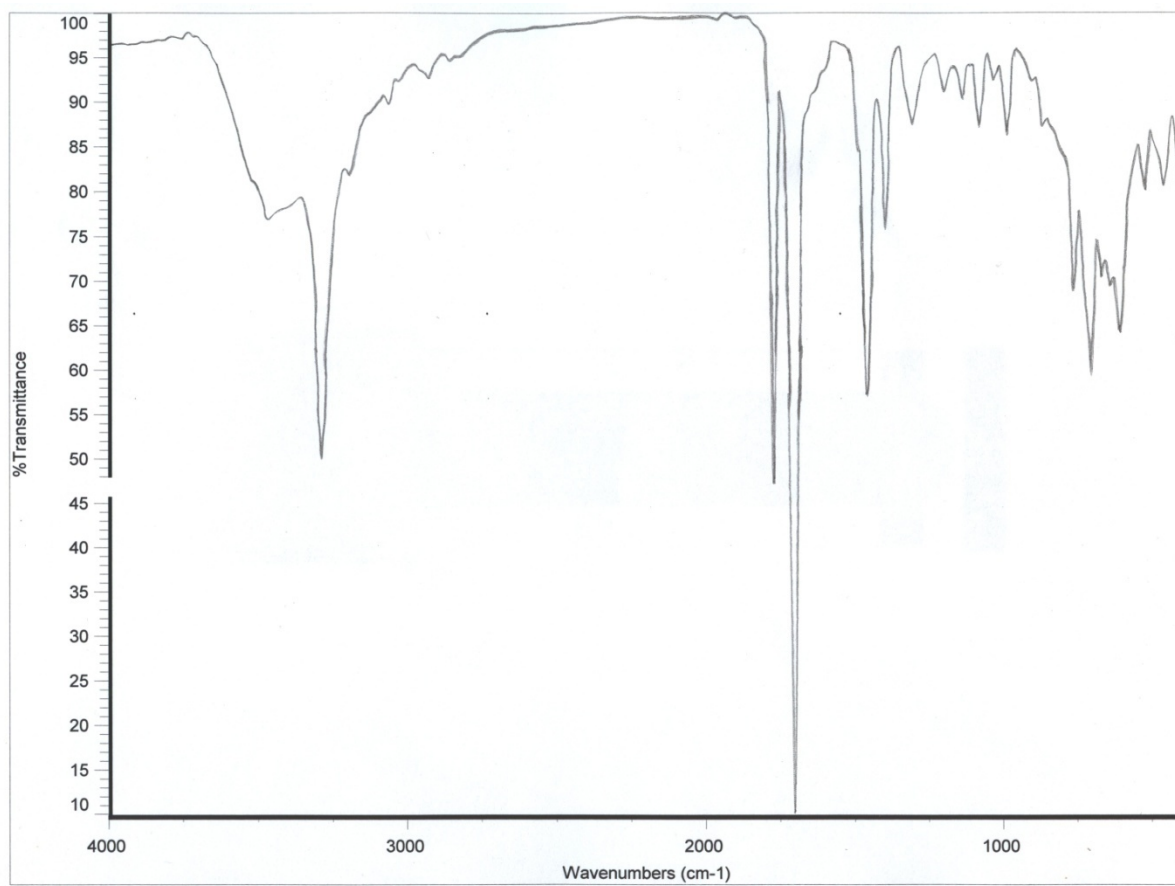

<sup>1</sup>H NMR of 5,5-diphenyl-2-thiohydantoin: (3e)

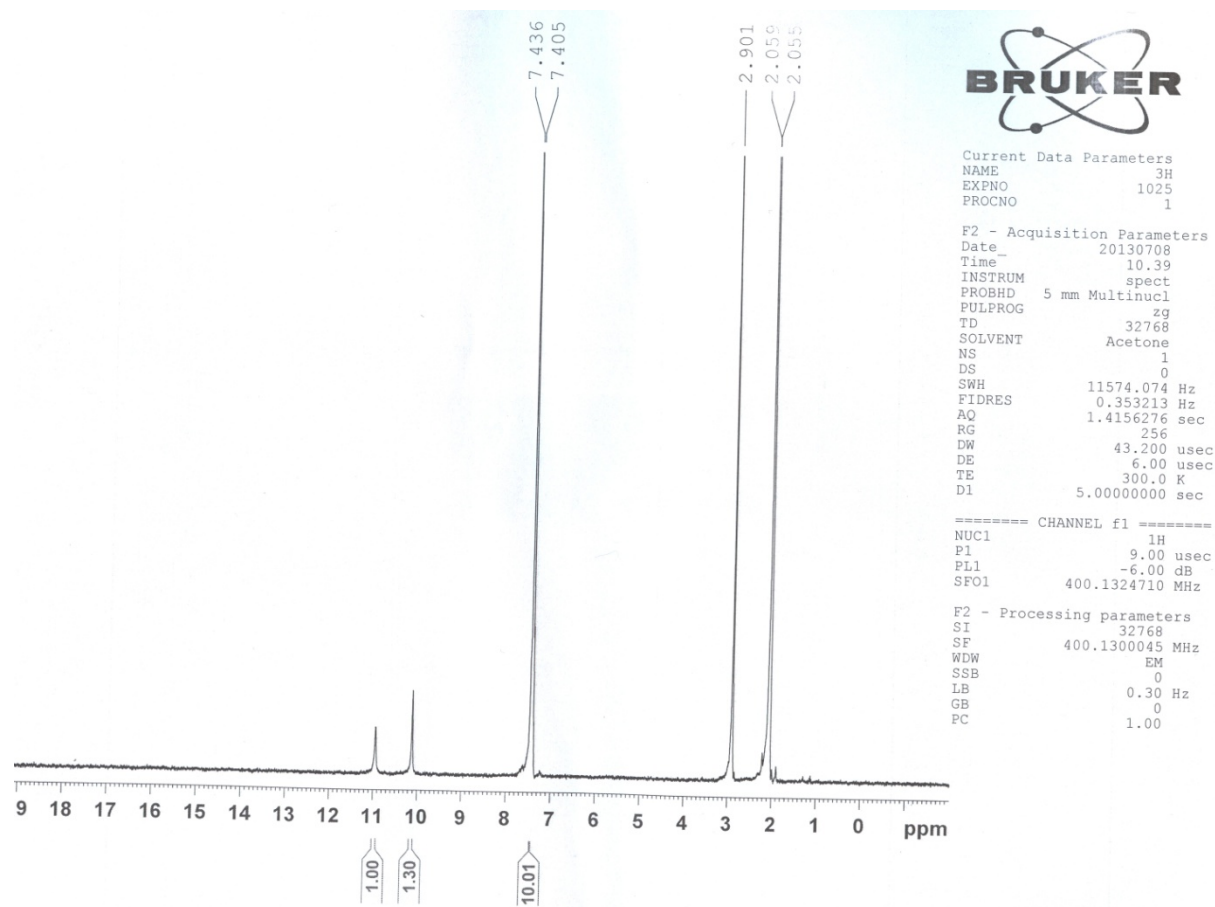

FT-IR of 5,5-diphenyl-2-thiohydantoin: (3e)

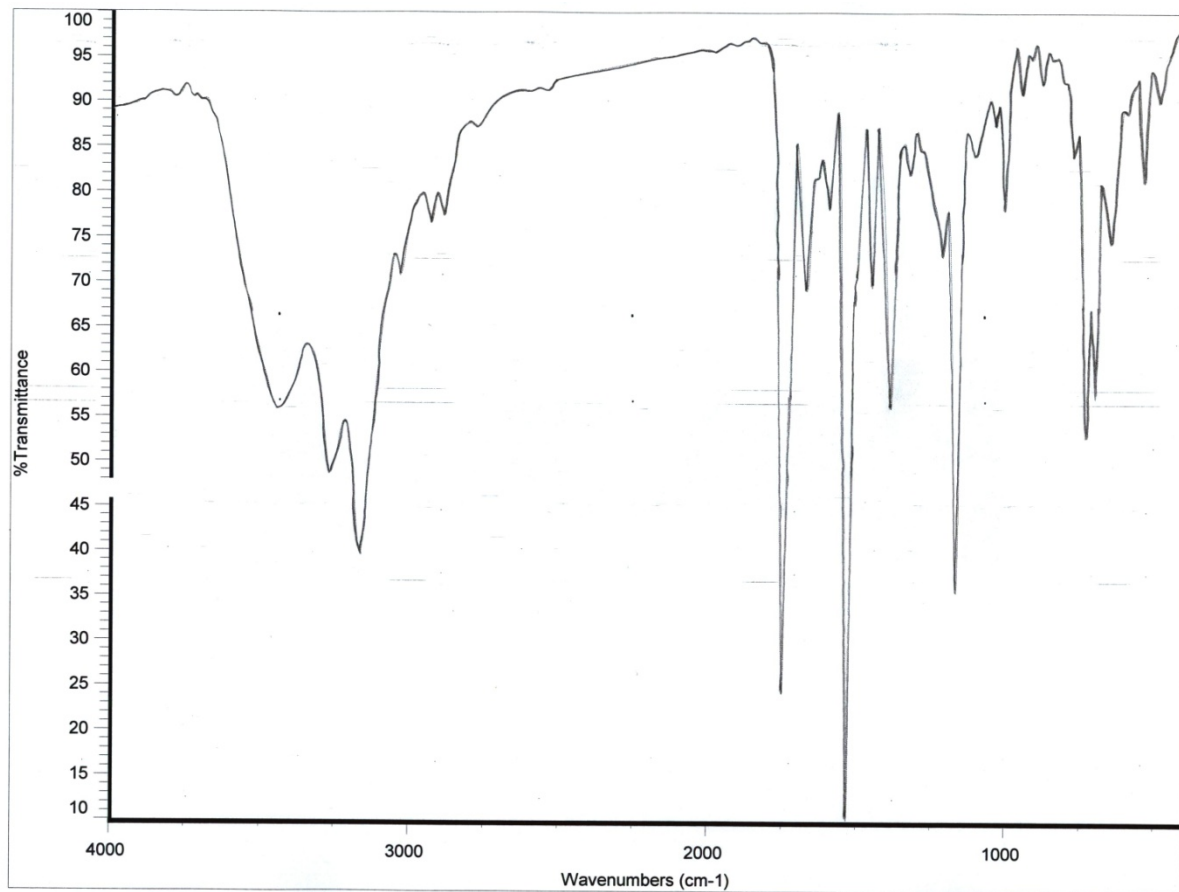

<sup>1</sup>H NMR of 3-methyl-5,5-diphenyl-2-thiohydantoin: (3g)

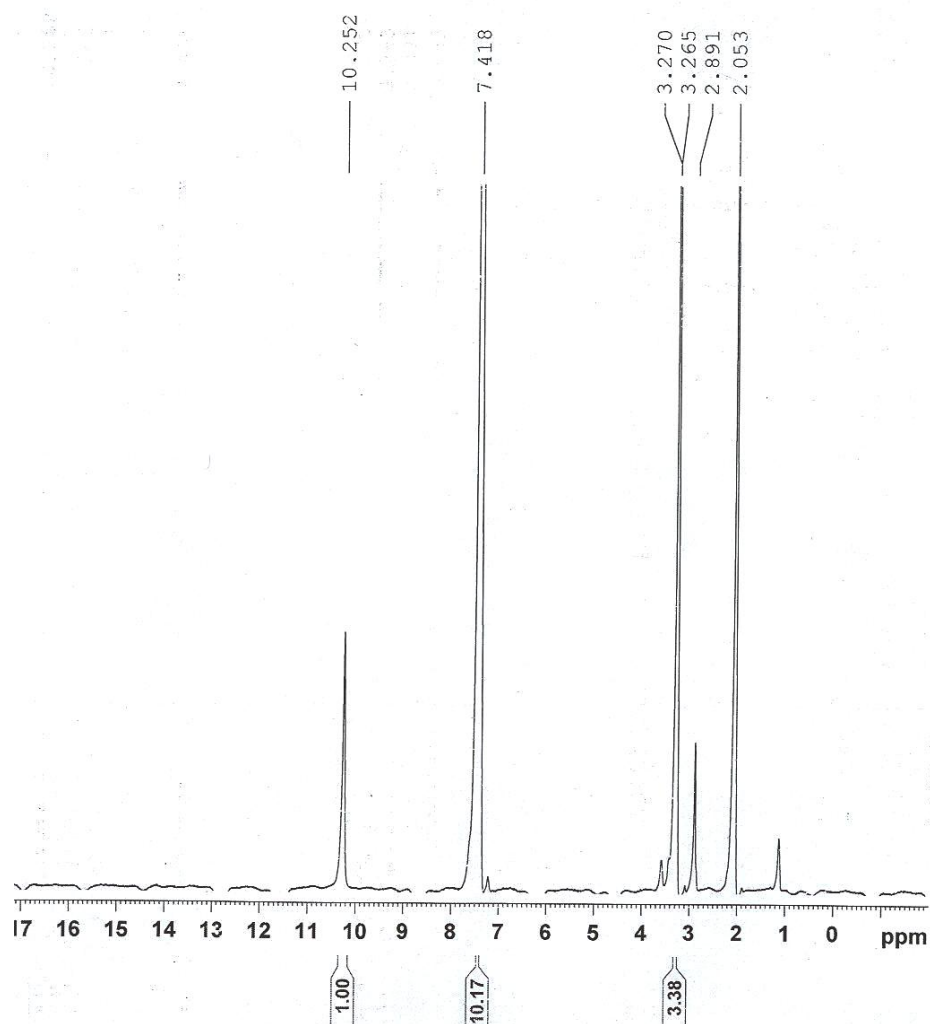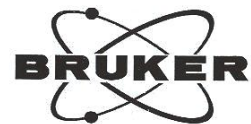

Current Data Parameters  
NAME 3H-3  
EXPNO 280  
PROCNO 1

F2 - Acquisition Parameters  
Date 20140318  
Time 10.31  
INSTRUM spect  
PROBHD 5 mm Multinucl  
PULPROG zg  
TD 32768  
SOLVENT Acetone  
NS 16  
DS 0  
SWH 11574.074 Hz  
FIDRES 0.353213 Hz  
AQ 1.4156276 sec  
RG 574.7  
DW 43.200 usec  
DE 6.00 usec  
TE 300.0 K  
D1 5.00000000 sec

==== CHANNEL f1 =====  
NUC1 1H  
P1 9.00 usec  
PL1 -6.00 dB  
SFO1 400.1324710 MHz

F2 - Processing parameters  
SI 32768  
SF 400.1300045 MHz  
WDW EM  
SSB 0  
LB 0.30 Hz  
GE 0  
PC 1.00

FT-IR of 3-methyl-5,5-diphenyl-2-thiohydantoin: (3g)

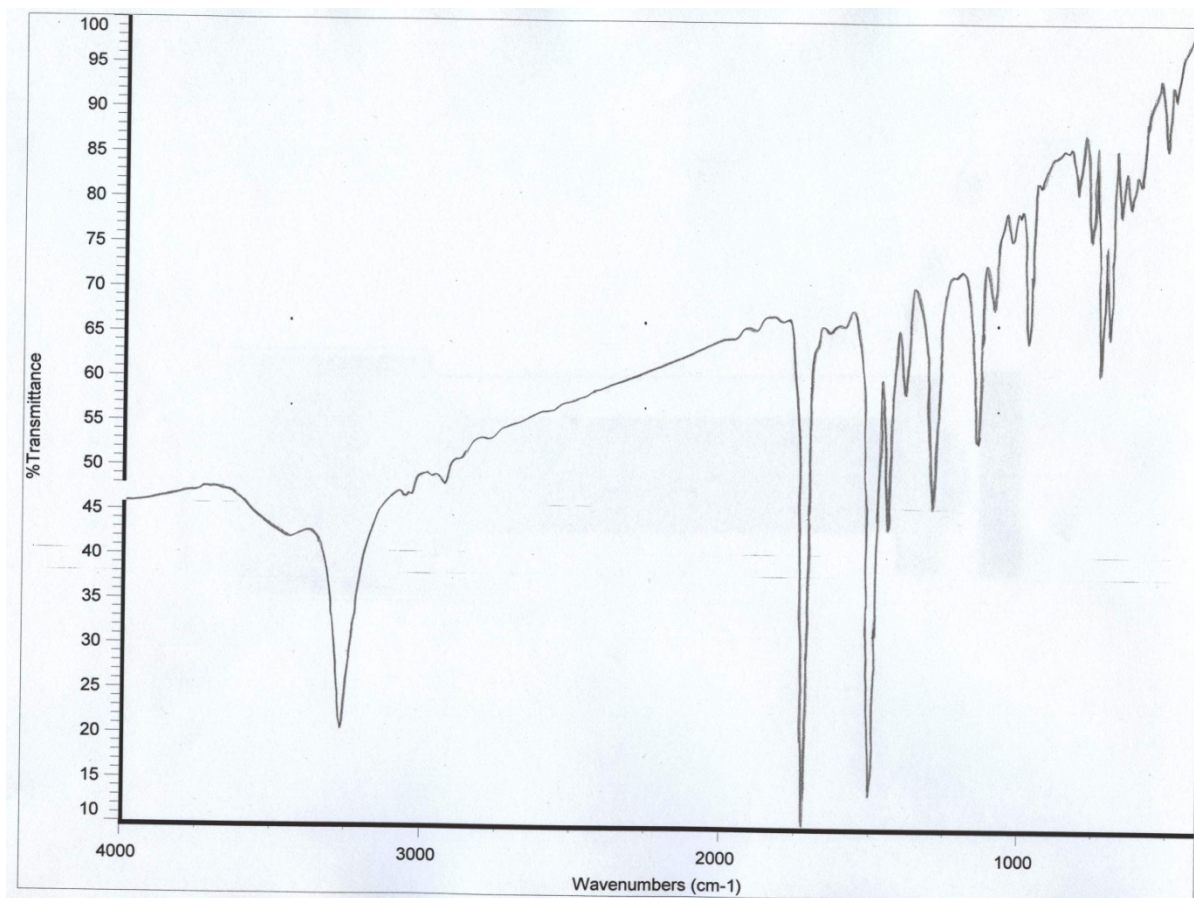

Supplement: c4ra06618a1.pdf [file c4ra06618a1.pdf]
